# Supplementary material for: A phosphoric acid-doped electrocatalyst supported on poly(para-pyridine benzimidazole)-wrapped carbon nanotubes shows a high durability and performance
Source: Royal Society of Chemistry journal article supplement (doi:10.1039/c5ta01650a), 2015-01-01
Supplement: c5ta01650a1.pdf [file c5ta01650a1.pdf]

## **Electronic Supplementary Information (ESI)**

**for**

### **Phosphoric acid-doped electrocatalyst supported on poly(*para*-pyridine benzimidazole)-wrapped carbon nanotubes shows a high durability and performance**

Zehui Yang<sup>a</sup>, Tsuyohiko Fujigaya<sup>a</sup> and Naotoshi Nakashima<sup>\*a,b,c</sup>

<sup>a</sup>*Department of Applied Chemistry, Graduate School of Engineering, Kyushu University,  
744 Motooka Nishi-ku, Fukuoka 819-0395, Japan*

<sup>b</sup>*International Institute for Carbon-Neutral Energy Research (WPI-I2CNER), Kyushu  
University, 744 Motooka Nishi-ku, Fukuoka 819-0395, Japan*

<sup>c</sup>*Japan Science and Technology Agency (JST), Core Research for Evolutionary  
Science and Technology (CREST), 5 Sanbancho, Chiyoda-ku, Tokyo, 102-0075,  
Japan*

\*E-mail: nakashima-tcm@mail.cstm.kyushu-u.ac.jp

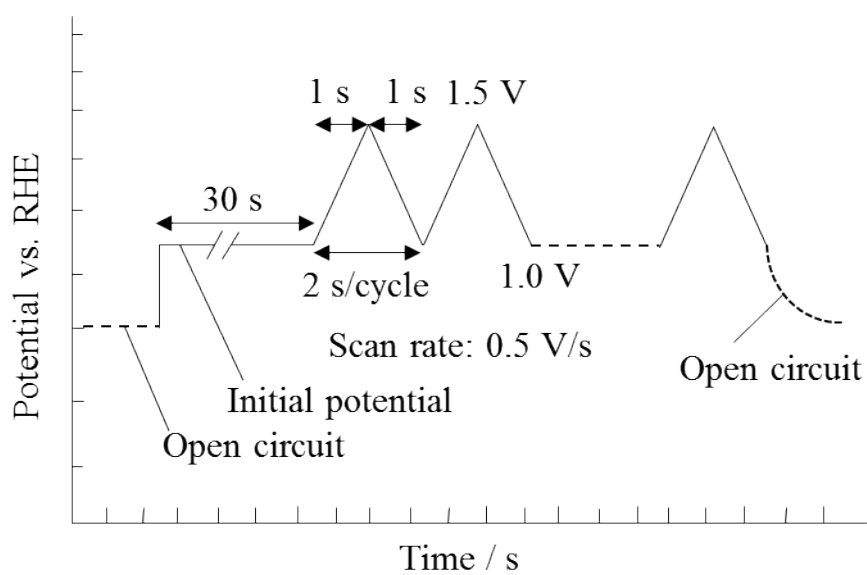

**Fig. S1.** New test protocol of durability test for a half-cell proposed by the Fuel Cell Commercialization Conference of Japan (see K. Shinohara, A. Ohma, A. Iiyama, T. Yoshida and T. Daimaru, *ECS Trans.*, 2011, **41**, 775-784).

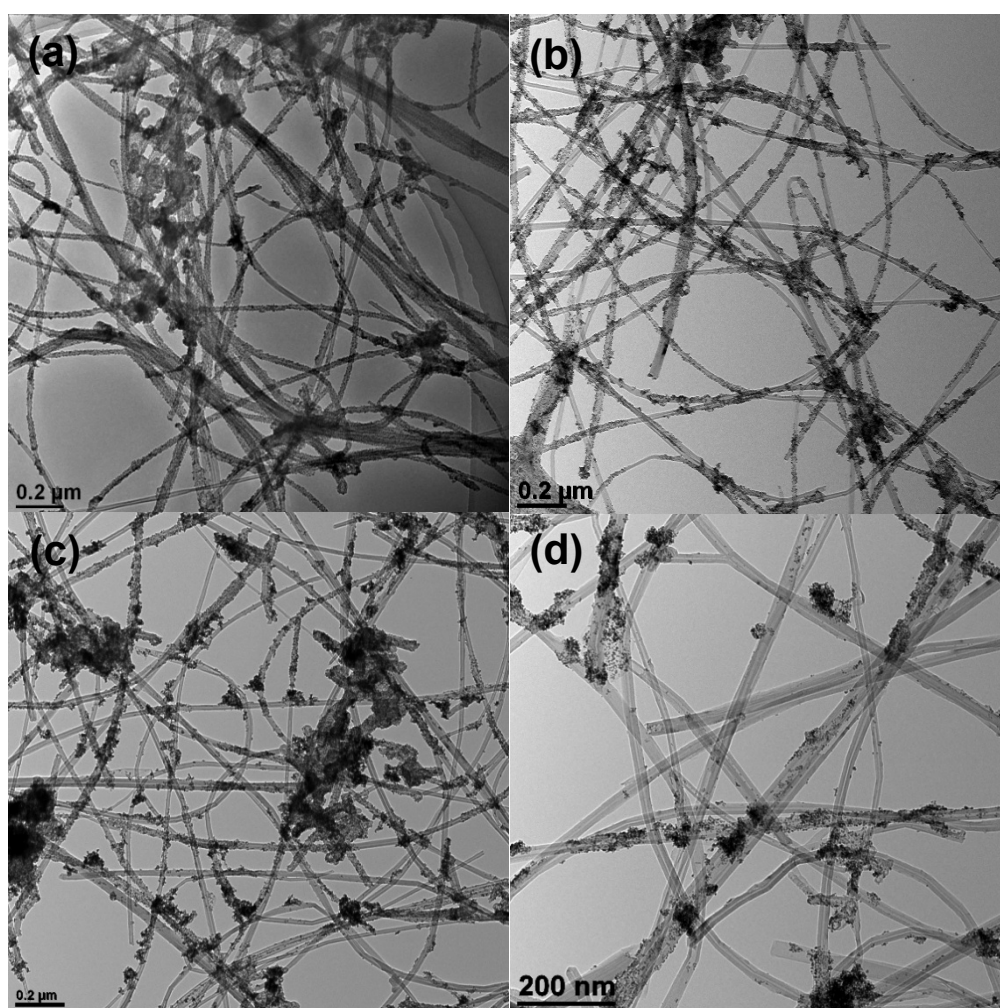

**Fig. S2.** TEM images of the MWNTs/*para*-PyPBI/Pt (a) and the PA-doped MWNTs/*para*-PyPBI/Pt (PA doping times are: 15 min (b), 1 h (c) and 3 h (d)).

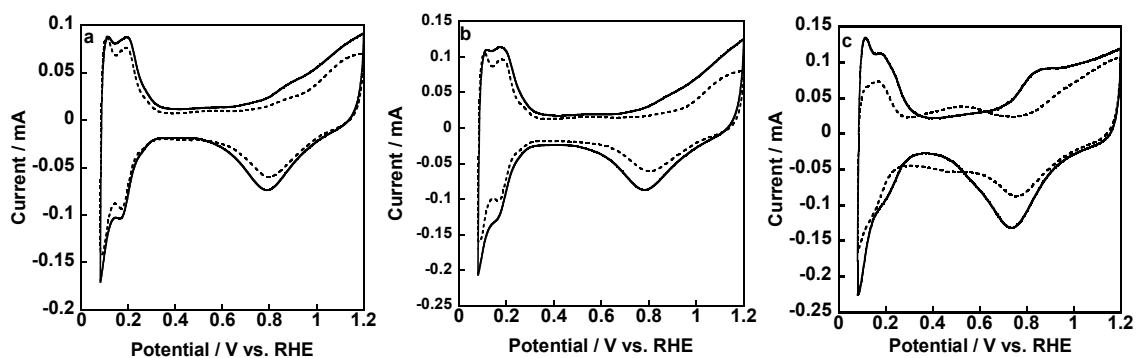

**Fig. S3.** CV curves of the MWNTs/*para*-PyPBI/Pt (a), MWNTs/*para*-PyPBI-PA/Pt (b) and CB/Pt (c) before (solid line) and after (dotted line) the durability test recorded in 0.1M HClO<sub>4</sub> at the scan rate of 50 mV s<sup>-1</sup>.

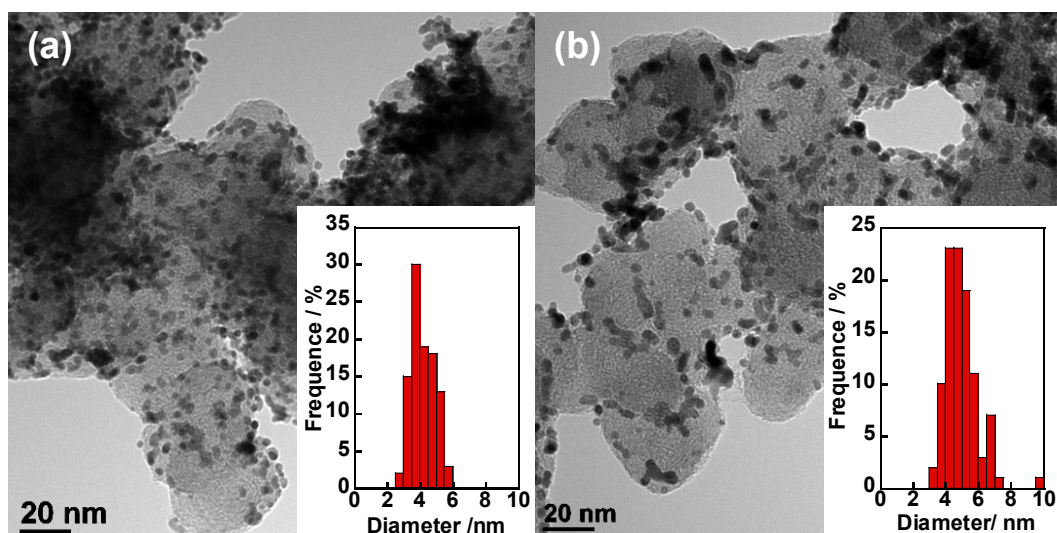

**Fig. S4.** TEM images of the conventional CB/Pt before (a) and after the durability test (b).

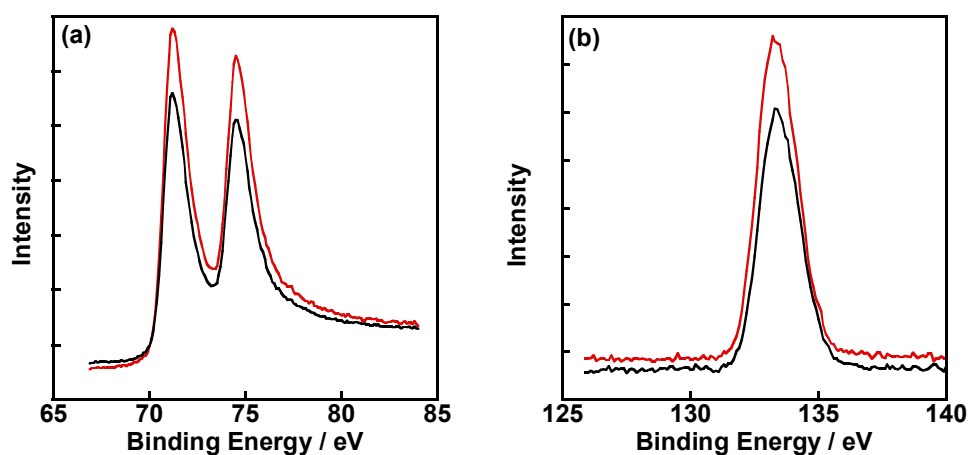

**Fig. S5.** Narrow scans of the XPS spectra for the GDE fabricated from MWNTs/*para*-PyPBI-PA/Pt in the regions of the Pt<sub>4f</sub> (a) and P<sub>2p</sub> (b) before (red) and after (black) fuel cell testing.

**Table S1.** D/G ratios of the pristine MWNTs, MWNTs/*para*-PyPBI, MWNTs/*para*-PyPBI/Pt and MWNTs/*para*-PyPBI-PA/Pt.

| Sample    | MWNTs | MWNTs/ <i>para</i> -PyPBI | MWNTs/ <i>para</i> -PyPBI/Pt | MWNTs/ <i>para</i> -PyPBI-PA/Pt |
|-----------|-------|---------------------------|------------------------------|---------------------------------|
| D/G ratio | 0.31  | 0.31                      | 0.33                         | 0.35                            |

**Table S2.** Comparison of surface elemental compositions of the GDE fabricated from MWNT/*para*-PyPBI-PA/Pt before and after fuel cell testing.

|        | Pt <sub>4f</sub> (wt%) | P <sub>2p</sub> (wt%) |
|--------|------------------------|-----------------------|
| Before | 90.4                   | 9.6                   |
| After  | 91.1                   | 8.9                   |
